# Supplementary material for: Human-elephant conflicts and attitude of the local communities toward African elephant (Loxodonta africana) conservation in Kafta Sheraro National Park, Tigray region, Ethiopia
Source: PeerJ journal article supplement (doi:10.7717/peerj.19428), 2025-05-22
Supplement: SuppFigures.zip [file Figure 1.pdf › SuppFigures/Figure 1.pdf]

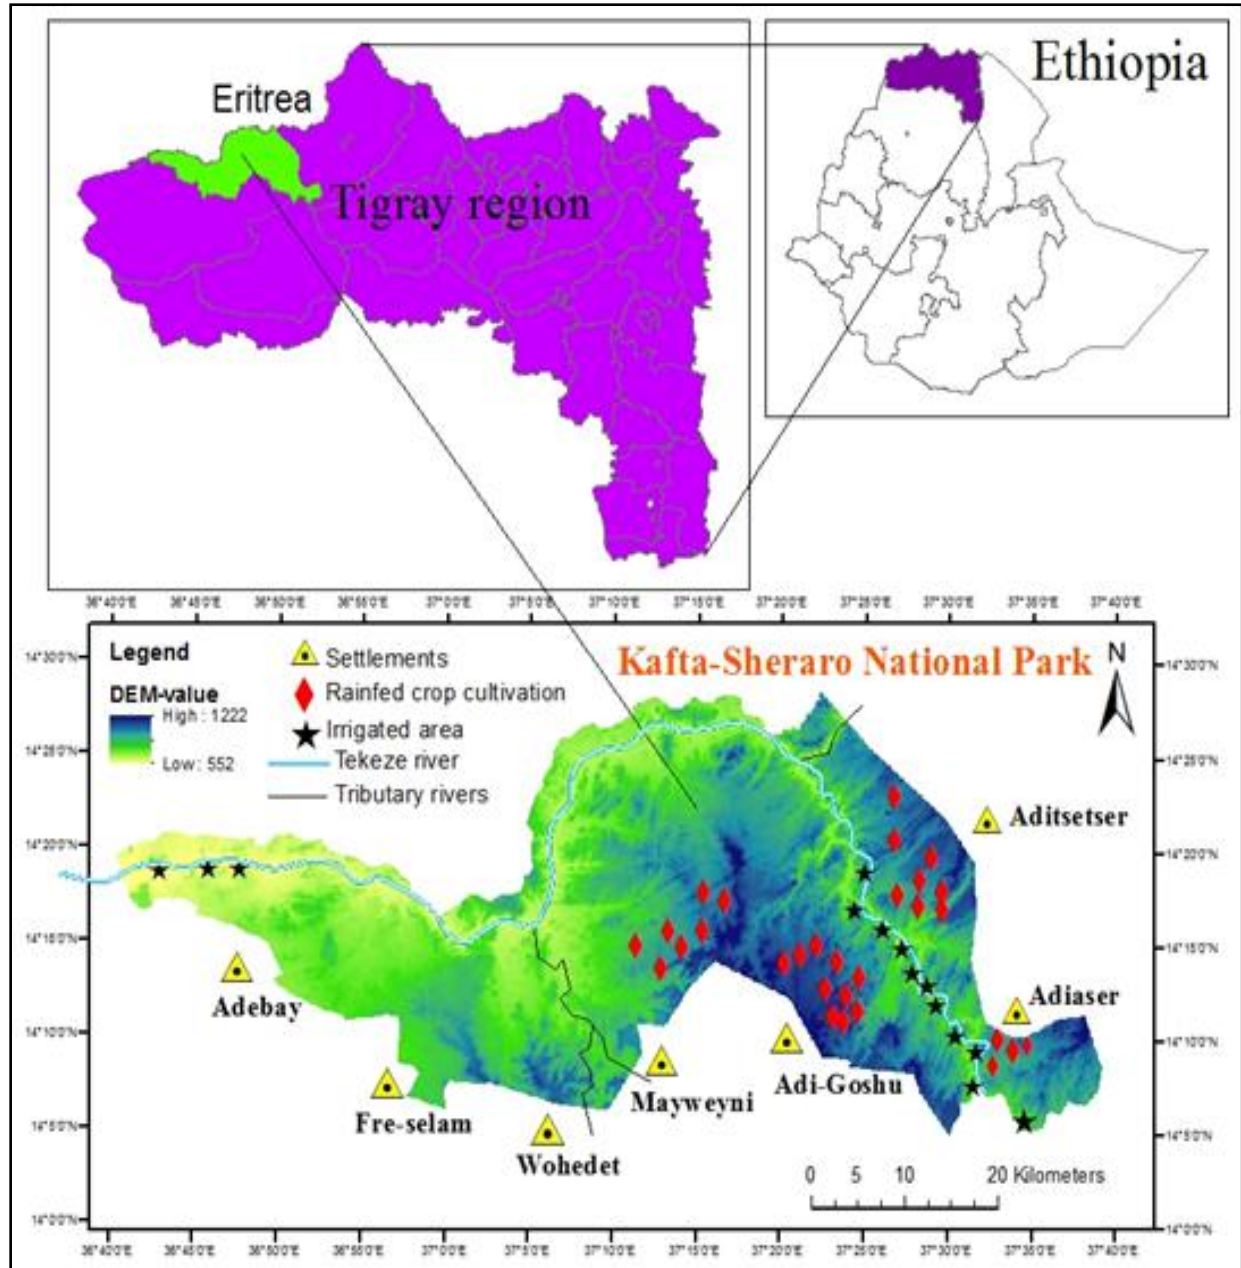

**Figure 1.** Location and elevation map of Kafta Sheraro National Park (KSNP) in the Tigray region (Fitsum et al., 2022). **Note:** The red/green color is created simply to differentiate the items one from the others and increase visibility, however, doesn't change any conceptual meaning on the entire map.
