# Supplementary material for: Human-elephant conflicts and attitude of the local communities toward African elephant (Loxodonta africana) conservation in Kafta Sheraro National Park, Tigray region, Ethiopia
Source: PeerJ journal article supplement (doi:10.7717/peerj.19428), 2025-05-22
Supplement: SuppFigures.zip [file Figure 2.pdf › SuppFigures/Figure 2.pdf]

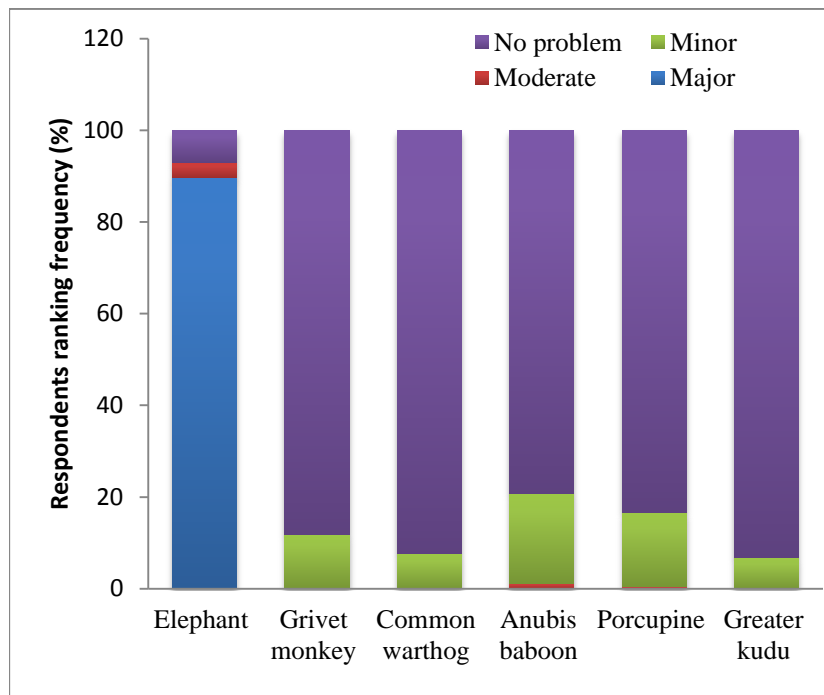

**Figure 2.** Local community recognized the existing crop raiders and the level of damage caused by each wild animal species. Ranking by (N=395) respondents from seven villages around KSNP between the 2018 and 2019 surveys. **Note:** The red/green color is created simply to differentiate the items one from the others and increase visibility, however, doesn't change any conceptual meaning on the entire map.
