# Supplementary material for: Human-elephant conflicts and attitude of the local communities toward African elephant (Loxodonta africana) conservation in Kafta Sheraro National Park, Tigray region, Ethiopia
Source: PeerJ journal article supplement (doi:10.7717/peerj.19428), 2025-05-22
Supplement: SuppFigures.zip [file Figure 3.pdf › SuppFigures/Figure 3.pdf]

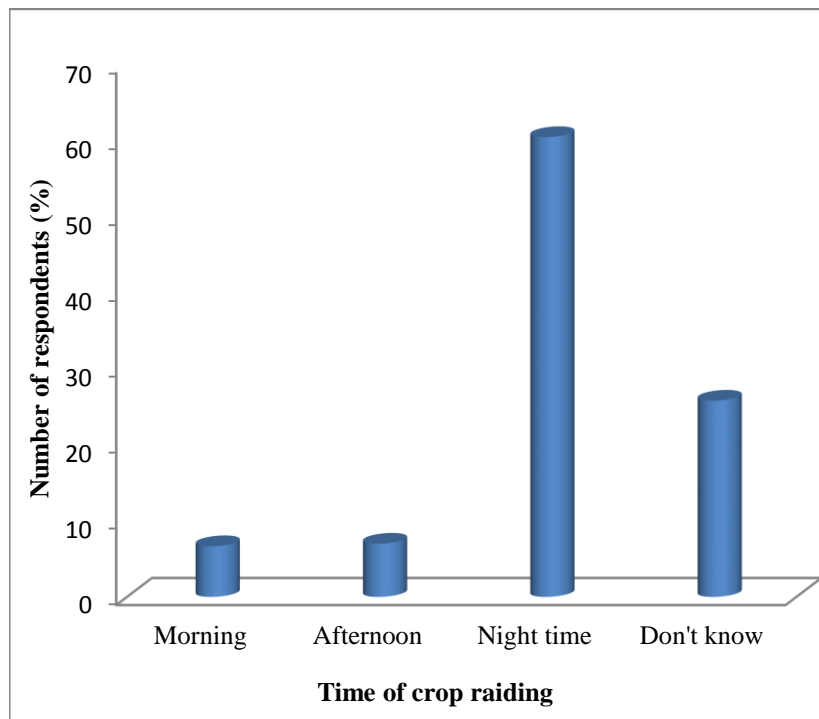

**Figure 3.** The local community field crops visited by African elephant inside and at the periphery of Kafta Sheraro National Park. Note: morning: 6:00 am-10:00 am; afternoon: 3:00 pm-6:00 pm; & night: 7:00 pm-5:00 am.
