# Supplementary material for: Human-elephant conflicts and attitude of the local communities toward African elephant (Loxodonta africana) conservation in Kafta Sheraro National Park, Tigray region, Ethiopia
Source: PeerJ journal article supplement (doi:10.7717/peerj.19428), 2025-05-22
Supplement: SuppFigures.zip [file Figure 4.pdf › SuppFigures/Figure 4.pdf]

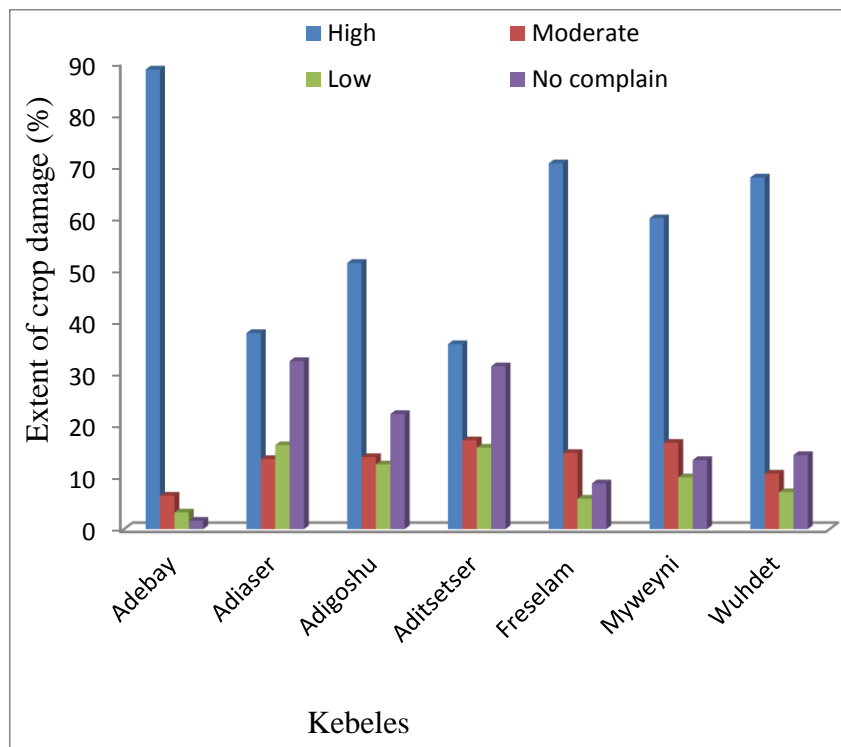

**Figure 4** Percentage of the respondents who described African elephant crop raiding & their extent (level) of the damaging impacts of field crops (high=significant damage, moderate = medium damage, low= insignificant damage, & no complaint=absence of crop damage) **Note:** The red/green color is created simply to differentiate the items one from the others and increase visibility, however, doesn't change any conceptual meaning on the entire map
