# Supplementary material for: Human-elephant conflicts and attitude of the local communities toward African elephant (Loxodonta africana) conservation in Kafta Sheraro National Park, Tigray region, Ethiopia
Source: PeerJ journal article supplement (doi:10.7717/peerj.19428), 2025-05-22
Supplement: SuppFigures.zip [file Figure 5.pdf › SuppFigures/Figure 5.pdf]

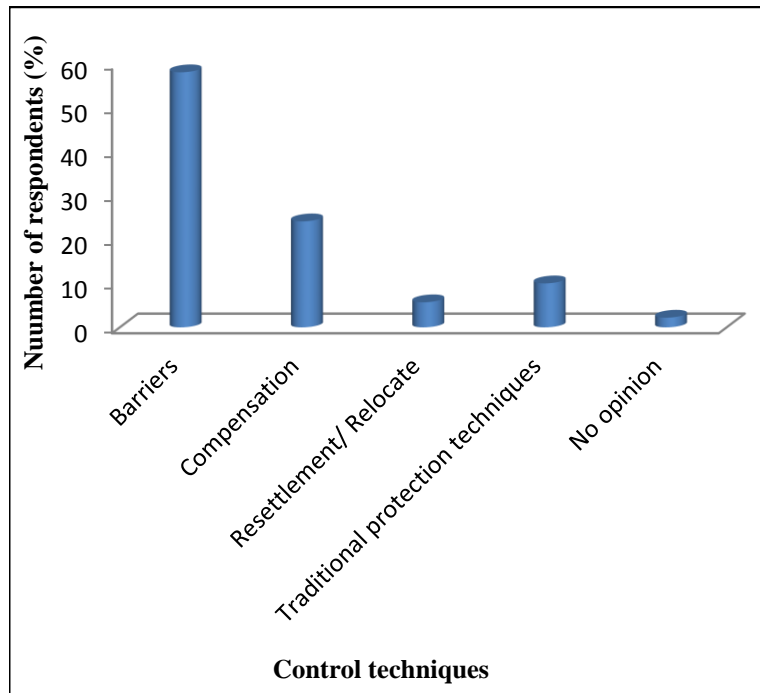

**Figure 5.** Sustainable management strategies of elephant crop raiding recommended by the local community surrounding Kafta Sheraro National Park
