# Supplementary figures and images for: Human-elephant conflicts and attitude of the local communities toward African elephant (Loxodonta africana) conservation in Kafta Sheraro National Park, Tigray region, Ethiopia
Source: PeerJ journal article supplement (doi:10.7717/peerj.19428), 2025-05-22

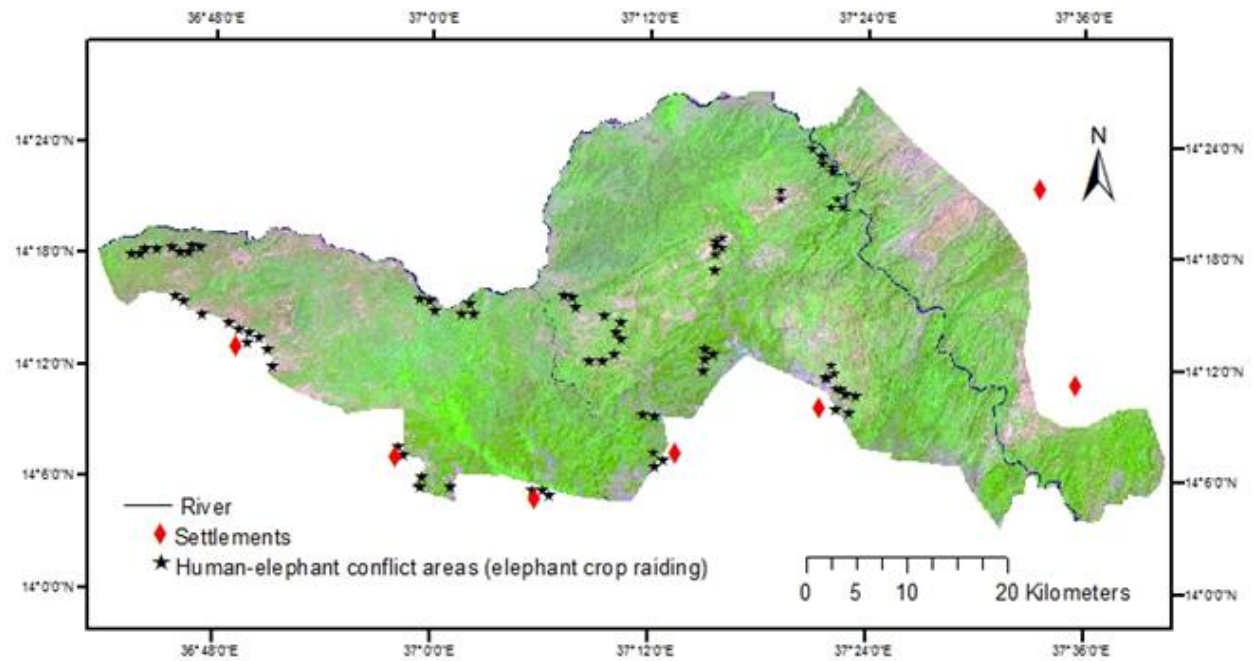

Figure 6. Locations of human-elephant conflict/elephant crop raiding areas in KSNP

Supplement: SuppFigures.zip [file Figure6.pdf › SuppFigures/Figure6.pdf]
